# Supplementary material
Source: publisher figshare collection journal article supplement (https://karger.figshare.com/ndownloader/files/23100020)
Supplement: Supplementary file 1 [file 23100020]

**Table S2** The full search strategy used in different database.

| **Database** | **The complete search** |
| --- | --- |
| PubMed | (S-1 [Title/Abstract] OR tegafur [Title/Abstract]) AND (5-fluorouracil [Title/Abstract] OR 5-FU [Title/Abstract] OR fluorouracil [Title/Abstract]) AND (gastric cancer [Title/Abstract] OR gastric carcinoma [Title/Abstract] OR stomach cancer [Title/Abstract] OR stomach carcinoma [Title/Abstract]) |
| ScienceDirect | Title, abstract, keywords: (S-1 OR tegafur) AND (5-fluorouracil OR 5-FU OR fluorouracil) AND (gastric cancer OR gastric carcinoma OR stomach cancer OR stomach carcinoma) |
| The Cochrane Library | [(S 1):ti,ab,kw OR (tegafur):ti,ab,kw] AND [(5 fluorouracil):ti,ab,kw OR (5 FU):ti,ab,kw OR (fluorouracil):ti,ab,kw] AND [(gastric cancer):ti,ab,kw OR (gastric carcinoma):ti,ab,kw OR (stomach cancer):ti,ab,kw OR (stomach carcinoma):ti,ab,kw] |
| Scopus | (TITLE-ABS-KEY(S-1) OR TITLE-ABS-KEY(tegafur)) AND (TITLE-ABS-KEY(5-fluorouracil) OR TITLE-ABS-KEY(5-FU) OR TITLE-ABS-KEY(fluorouracil)) AND (TITLE-ABS-KEY(gastric cancer) OR TITLE-ABS-KEY(gastric carcinoma) OR TITLE-ABS-KEY(stomach cancer) OR TITLE-ABS-KEY(stomach carcinoma)) |
| Web of Science | TS=(S-1 OR tegafur) AND TS=(5-fluorouracil OR 5-FU OR fluorouracil) AND TS=(gastric cancer OR gastric carcinoma OR stomach cancer OR stomach carcinoma) |
| Embase | ((S-1OR tegafur) AND (5-fluorouracil OR 5-FU OR fluorouracil) AND (gastric cancer OR gastric carcinoma OR stomach cancer OR stomach carcinoma)).mp. [mp=title, abstract, heading word, drug trade name, original title, device manufacturer, drug manufacturer, device trade name, keyword, floating subheading word, candidate term word] |
| Ovid MEDLINE | ((S-1 OR tegafur) AND (5-fluorouracil OR 5-FU OR fluorouracil) AND (gastric cancer OR gastric carcinoma OR stomach cancer OR stomach carcinoma)).mp. [mp=ti, ab, tx, ct, sh, ot, nm, hw, fx, kf, ox, px, rx, an, ui, sy] |
| CNKI | AB=("S-1" + "tegafur") AND AB=("5-fluorouracil" + "5-FU" + "fluorouracil") AND AB=("gastric cancer" + "gastric carcinoma" + "stomach cancer" + "stomach carcinoma") |
